# Supplementary material
Source: HighWire-hosted journal article supplement (https://drc.bmj.com/content/suppl/2021/03/31/9.1.e001953)
Supplement: bmjdrc-2020-001953supp006_data_supplement.pdf [file bmjdrc-2020-001953supp006_data_supplement.pdf]

| <b>Supplemental Table 6. Associations between NMR analytes and long-term T2D using Cox models.</b> |               |       |                    |                    |                |
|----------------------------------------------------------------------------------------------------|---------------|-------|--------------------|--------------------|----------------|
|                                                                                                    | Treatment arm | HR    | 95% CI lower limit | 95% CI upper limit | <i>P</i> value |
| ApoA1                                                                                              | Lifestyle     | 0.994 | 0.989              | 0.998              | 0.005          |
|                                                                                                    | Metformin     | 0.999 | 0.995              | 1.003              | 0.576          |
|                                                                                                    | Placebo       | 0.996 | 0.992              | 1.000              | 0.052          |
|                                                                                                    | Pooled        | 0.996 | 0.994              | 0.999              | 0.002          |
| ApoB                                                                                               | Lifestyle     | 1.004 | 1.000              | 1.009              | 0.057          |
|                                                                                                    | Metformin     | 1.003 | 0.998              | 1.007              | 0.204          |
|                                                                                                    | Placebo       | 1.001 | 0.997              | 1.005              | 0.619          |
|                                                                                                    | Pooled        | 1.003 | 1.000              | 1.005              | 0.029          |
| H1P                                                                                                | Lifestyle     | 0.959 | 0.898              | 1.023              | 0.204          |
|                                                                                                    | Metformin     | 1.02  | 0.959              | 1.084              | 0.528          |
|                                                                                                    | Placebo       | 1.012 | 0.955              | 1.072              | 0.696          |
|                                                                                                    | Pooled        | 1.000 | 0.965              | 1.036              | 0.985          |
| H2P                                                                                                | Lifestyle     | 1.03  | 0.995              | 1.066              | 0.095          |
|                                                                                                    | Metformin     | 1.007 | 0.976              | 1.04               | 0.649          |
|                                                                                                    | Placebo       | 0.999 | 0.969              | 1.03               | 0.964          |
|                                                                                                    | Pooled        | 1.011 | 0.993              | 1.03               | 0.243          |
| H3P                                                                                                | Lifestyle     | 0.96  | 0.916              | 1.007              | 0.097          |
|                                                                                                    | Metformin     | 0.989 | 0.949              | 1.03               | 0.592          |
|                                                                                                    | Placebo       | 0.949 | 0.907              | 0.992              | 0.021          |
|                                                                                                    | Pooled        | 0.966 | 0.941              | 0.991              | 0.007          |
| H4P                                                                                                | Lifestyle     | 0.893 | 0.807              | 0.988              | 0.029          |
|                                                                                                    | Metformin     | 0.984 | 0.897              | 1.08               | 0.737          |
|                                                                                                    | Placebo       | 0.976 | 0.898              | 1.062              | 0.576          |
|                                                                                                    | Pooled        | 0.95  | 0.901              | 1.002              | 0.059          |
| H5P                                                                                                | Lifestyle     | 0.934 | 0.782              | 1.114              | 0.446          |
|                                                                                                    | Metformin     | 1.045 | 0.892              | 1.225              | 0.582          |
|                                                                                                    | Placebo       | 0.892 | 0.762              | 1.044              | 0.154          |
|                                                                                                    | Pooled        | 0.95  | 0.864              | 1.044              | 0.287          |
| H6P                                                                                                | Lifestyle     | 0.726 | 0.599              | 0.881              | 0.001          |
|                                                                                                    | Metformin     | 0.887 | 0.749              | 1.05               | 0.164          |
|                                                                                                    | Placebo       | 1.000 | 0.863              | 1.158              | 0.995          |
|                                                                                                    | Pooled        | 0.878 | 0.798              | 0.967              | 0.008          |
| H7P                                                                                                | Lifestyle     | 0.481 | 0.271              | 0.854              | 0.012          |
|                                                                                                    | Metformin     | 0.62  | 0.359              | 1.071              | 0.087          |
|                                                                                                    | Placebo       | 1.195 | 0.723              | 1.976              | 0.488          |
|                                                                                                    | Pooled        | 0.714 | 0.525              | 0.971              | 0.032          |
| Large HDL                                                                                          | Lifestyle     | 0.836 | 0.746              | 0.936              | 0.002          |
|                                                                                                    | Metformin     | 0.955 | 0.864              | 1.056              | 0.372          |
|                                                                                                    | Placebo       | 0.962 | 0.873              | 1.059              | 0.429          |
|                                                                                                    | Pooled        | 0.92  | 0.867              | 0.976              | 0.006          |

|            |           |       |       |       |                      |
|------------|-----------|-------|-------|-------|----------------------|
| Medium HDL | Lifestyle | 0.947 | 0.906 | 0.989 | 0.014                |
|            | Metformin | 0.988 | 0.952 | 1.026 | 0.533                |
|            | Placebo   | 0.954 | 0.916 | 0.992 | 0.019                |
|            | Pooled    | 0.962 | 0.94  | 0.985 | 0.001                |
| Small HDL  | Lifestyle | 1.016 | 0.983 | 1.051 | 0.347                |
|            | Metformin | 1.012 | 0.981 | 1.044 | 0.447                |
|            | Placebo   | 1.002 | 0.973 | 1.033 | 0.876                |
|            | Pooled    | 1.01  | 0.992 | 1.029 | 0.264                |
| Total HDL  | Lifestyle | 0.982 | 0.973 | 0.991 | $1.1 \times 10^{-4}$ |
|            | Metformin | 0.99  | 0.981 | 0.999 | 0.029                |
|            | Placebo   | 0.985 | 0.976 | 0.994 | 0.001                |
|            | Pooled    | 0.985 | 0.98  | 0.99  | $1.2 \times 10^{-8}$ |
| HDL size   | Lifestyle | 0.444 | 0.303 | 0.65  | $3.0 \times 10^{-5}$ |
|            | Metformin | 0.671 | 0.463 | 0.97  | 0.034                |
|            | Placebo   | 0.913 | 0.653 | 1.277 | 0.595                |
|            | Pooled    | 0.657 | 0.534 | 0.807 | $6.6 \times 10^{-5}$ |
| Large LDL  | Lifestyle | 0.999 | 0.998 | 0.999 | $2.1 \times 10^{-4}$ |
|            | Metformin | 0.999 | 0.999 | 1.000 | 0.017                |
|            | Placebo   | 0.999 | 0.998 | 1.000 | 0.001                |
|            | Pooled    | 0.999 | 0.999 | 0.999 | $2.7 \times 10^{-8}$ |
| Medium LDL | Lifestyle | 1.000 | 1.000 | 1.000 | 0.718                |
|            | Metformin | 1.000 | 0.999 | 1.000 | 0.056                |
|            | Placebo   | 1.000 | 0.999 | 1.000 | 0.09                 |
|            | Pooled    | 1.000 | 1.000 | 1.000 | 0.062                |
| Small LDL  | Lifestyle | 1.000 | 1.000 | 1.000 | 0.004                |
|            | Metformin | 1.000 | 1.000 | 1.001 | $2.8 \times 10^{-4}$ |
|            | Placebo   | 1.000 | 1.000 | 1.000 | 0.001                |
|            | Pooled    | 1.000 | 1.000 | 1.000 | $1.4 \times 10^{-8}$ |
| Total LDL  | Lifestyle | 1.001 | 0.998 | 1.004 | 0.547                |
|            | Metformin | 0.999 | 0.996 | 1.002 | 0.464                |
|            | Placebo   | 0.999 | 0.996 | 1.002 | 0.46                 |
|            | Pooled    | 1.000 | 0.998 | 1.001 | 0.602                |
| LDL size   | Lifestyle | 0.738 | 0.618 | 0.882 | 0.001                |
|            | Metformin | 0.76  | 0.634 | 0.911 | 0.003                |
|            | Placebo   | 0.776 | 0.655 | 0.92  | 0.003                |
|            | Pooled    | 0.761 | 0.688 | 0.842 | $1.2 \times 10^{-7}$ |
| TC         | Lifestyle | 1.001 | 0.998 | 1.003 | 0.594                |
|            | Metformin | 1.000 | 0.998 | 1.003 | 0.786                |
|            | Placebo   | 1.000 | 0.997 | 1.002 | 0.846                |
|            | Pooled    | 1.000 | 0.999 | 1.002 | 0.812                |
| TG         | Lifestyle | 1.001 | 1.000 | 1.002 | 0.021                |
|            | Metformin | 1.002 | 1.001 | 1.003 | 0.001                |
|            | Placebo   | 1.001 | 1.000 | 1.002 | 0.002                |

|                |           |       |       |       |                      |
|----------------|-----------|-------|-------|-------|----------------------|
|                | Pooled    | 1.001 | 1.001 | 1.002 | $4.2 \times 10^{-7}$ |
| TRL-C          | Lifestyle | 1.001 | 0.998 | 1.003 | 0.638                |
|                | Metformin | 1.001 | 0.998 | 1.004 | 0.474                |
|                | Placebo   | 1.000 | 0.997 | 1.002 | 0.829                |
|                | Pooled    | 1.000 | 0.999 | 1.002 | 0.557                |
| Large TRL      | Lifestyle | 1.008 | 0.992 | 1.023 | 0.319                |
|                | Metformin | 1.009 | 0.992 | 1.026 | 0.303                |
|                | Placebo   | 1.014 | 0.998 | 1.029 | 0.08                 |
|                | Pooled    | 1.01  | 1.001 | 1.019 | 0.029                |
| Medium TRL     | Lifestyle | 1.003 | 0.998 | 1.008 | 0.202                |
|                | Metformin | 1.001 | 0.996 | 1.006 | 0.706                |
|                | Placebo   | 1.004 | 0.999 | 1.008 | 0.131                |
|                | Pooled    | 1.003 | 1.000 | 1.005 | 0.069                |
| Small TRL      | Lifestyle | 0.998 | 0.995 | 1.001 | 0.131                |
|                | Metformin | 0.997 | 0.994 | 0.999 | 0.014                |
|                | Placebo   | 0.998 | 0.996 | 1.001 | 0.187                |
|                | Pooled    | 0.998 | 0.996 | 0.999 | 0.003                |
| TRL-TG         | Lifestyle | 1.001 | 1.000 | 1.002 | 0.046                |
|                | Metformin | 1.000 | 0.999 | 1.001 | 0.474                |
|                | Placebo   | 1.001 | 1.000 | 1.002 | 0.046                |
|                | Pooled    | 1.001 | 1.000 | 1.001 | 0.01                 |
| Very large TRL | Lifestyle | 1.067 | 0.995 | 1.145 | 0.068                |
|                | Metformin | 0.997 | 0.927 | 1.072 | 0.93                 |
|                | Placebo   | 1.041 | 0.954 | 1.136 | 0.369                |
|                | Pooled    | 1.022 | 0.979 | 1.067 | 0.313                |
| Very small TRL | Lifestyle | 1.004 | 1.002 | 1.006 | $3.8 \times 10^{-4}$ |
|                | Metformin | 1.004 | 1.002 | 1.006 | $3.1 \times 10^{-4}$ |
|                | Placebo   | 1.001 | 1.000 | 1.003 | 0.14                 |
|                | Pooled    | 1.003 | 1.002 | 1.004 | $7.2 \times 10^{-7}$ |
| TRL size       | Lifestyle | 1.017 | 1.006 | 1.028 | 0.003                |
|                | Metformin | 1.015 | 1.005 | 1.025 | 0.004                |
|                | Placebo   | 1.011 | 1.001 | 1.022 | 0.024                |
|                | Pooled    | 1.014 | 1.008 | 1.02  | $5.5 \times 10^{-6}$ |

All analyses are adjusted by age, sex and ethnicity.
